# Supplementary material for: Peripheral neuropathy in Parkinson’s disease: prevalence and functional impact on gait and balance
Source: PubMed Central journal article supplement — Brain. 2022 Jan 28;146(1):225–36. doi: 10.1093/brain/awac026 (PMC9825570; doi:10.1093/brain/awac026), 2022-01-28
Supplement: awac026_supplementary_data.pdf [file awac026_supplementary_data.pdf]

## Supplementary material

**Supplementary table 1.** Main clinical, neurophysiological and neuropathological characteristics of peripheral neuropathy assessment between Parkinson's disease patients with (PD-PNP) and without (PD-noPNP) peripheral neuropathy.

|                                               | PD-PNP (N=40) | PD-noPNP (N=59) | p         |
|-----------------------------------------------|---------------|-----------------|-----------|
| NIS-LL                                        | 3.7 (3)       | 1.4 (2)         | <0.001*** |
| mTCNS                                         | 3.4 (2)       | 1.3 (2)         | <0.001*** |
| Sural nerve SNAP amplitude ( $\mu$ V)         | 12.5 (10)     | 16 (8)          | 0.011*    |
| Sup. peroneal nerve SNAP amplitude ( $\mu$ V) | 11.8 (8)      | 14.5 (6)        | 0.028*    |
| Peroneal nerve CMAP amplitude (mV)            | 4.5 (2)       | 5.2 (2)         | 0.126     |
| Peroneal nerve CMAP velocity (m/s)            | 47.2 (9)      | 48.2 (4)        | 0.792     |
| Peroneal nerve CMAP latency (ms)              | 3.5 (0.8)     | 3.4 (0.5)       | 0.091     |
| QST $\geq$ 97 <sup>th</sup> (N)               | 19            | 3               | 0.003*    |
| IENFD proximal                                | 11.4 (4)      | 11.5 (4)        | 0.88      |
| IENFD distal                                  | 6.1 (3)       | 8.2 (3)         | <0.001*** |

Values are expressed in mean (SD), except for QST value corresponding to subjects' number. CMAP: compound muscle action potential; IENFD: Intraepidermal nerve fiber density; mTCNS: modified Toronto Clinical Neuropathy Score; NIS-LL: Neuropathy Impairment Score for Lower Limbs; PD-PNP: Parkinson's disease patients with peripheral neuropathy; PD-noPNP: Parkinson's disease patients without peripheral neuropathy; QST: Quantitative Sensory Test; SNAP: sensory nerve action potential; Sup: superficial; \*p<0.05; \*\*\*p<0.001

**Supplementary table 2.** Clinical and demographic characteristics of large and small fiber neuropathy groups.

|                                               | Large fiber neuropathy | Small fiber neuropathy | p         |
|-----------------------------------------------|------------------------|------------------------|-----------|
| Sex                                           | 4F (33.3 %)            | 14F (50 %)             | 0.374     |
| Age                                           | 69.5 (12)              | 65.3 (10)              | 0.118     |
| PD onset (years)                              | 59 (17)                | 59.8 (10)              | 0.558     |
| Disease duration (years)                      | 7.9 (7)                | 6.9 (5)                | 0.845     |
| H&Y                                           | 2.5                    | 2                      | 0.284     |
| LEDD (mg)                                     | 768.5 (333)            | 725.2 (386)            | 0.642     |
| UPDRS III ON                                  | 15.3 (10)              | 15.1 (9)               | 0.964     |
| UPDRS III OFF                                 | 24.9 (14)              | 24.1 (11)              | 0.988     |
| NMSS                                          | 28.4 (18)              | 29.2 (23)              | 0.799     |
| DRS                                           | 125.7 (14)             | 120.4 (16)             | 0.343     |
| NIS-LL                                        | 4.6 (3)                | 3.2 (2)                | 0.188     |
| mTCNS                                         | 3.5 (3)                | 3.2 (2)                | 0.642     |
| Sural nerve SNAP amplitude ( $\mu$ V)         | 3.4 (3)                | 16.4 (10)              | <0.001*** |
| Sup. peroneal nerve SNAP amplitude ( $\mu$ V) | 4.1 (3)                | 15.2 (7)               | <0.001*** |
| Peroneal nerve CMAP amplitude (mV)            | 3.5 (3)                | 4.9 (2)                | 0.033*    |
| Peroneal nerve CMAP velocity (m/s)            | 43.4 (15)              | 48.8 (4)               | 0.188     |
| Peroneal nerve CMAP latency (ms)              | 3.4 (1)                | 3.6 (0.5)              | 0.916     |
| QST $\geq$ 97 <sup>th</sup> (N)               | 5 (41.6 %)             | 14 (50 %)              | 0.889     |
| IENFD proximal                                | 9.7 (2)                | 12.2 (4)               | 0.079     |
| IENFD distal                                  | 5.1 (2)                | 6.5 (3)                | 0.423     |

Values are expressed in mean (SD), except for QST value corresponding to subjects' number. CMAP: compound muscle action potential; DRS: dementia rating scale; H&Y: Hoehn and Yahr stage; IENFD: Intraepidermal nerve fiber density; LEDD: Levodopa Equivalent Daily Dose; mTCNS: modified Toronto Clinical Neuropathy Score; NIS-LL: Neuropathy Impairment Score for Lower Limbs; NMSS: Non-motor symptoms scale for Parkinson's disease; PD-PNP: Parkinson's disease patients with peripheral neuropathy; PD-noPNP: Parkinson's disease patients without peripheral neuropathy; QST: Quantitative Sensory Test; SNAP: sensory nerve action potential; Sup: superficial; UPDRS: Unified Parkinson's Disease Rating Scale. p<0.05; \*\*p<0.01.

**Supplementary table 3.** Etiological classification and laboratory work-up for PD-PNP participants.

| PD-PNP patients | PNP type | Etiology                                                 | Laboratorial findings                                               |
|-----------------|----------|----------------------------------------------------------|---------------------------------------------------------------------|
| #1              | Small FN | Undisclosed etiology                                     |                                                                     |
| #2              | Small FN | Abnormal metabolic alterations                           | VB12=182.9 pg/L                                                     |
| #3              | Small FN | Abnormal metabolic alterations                           | VB12=464.9 pg/L; MMA=560 nmol/L                                     |
| #4              | Small FN | Abnormal metabolic alterations                           | VB12=232.3 pg/L; MMA=498 nmol/L                                     |
| #5              | Small FN | Undisclosed etiology                                     |                                                                     |
| #6              | Small FN | Undisclosed etiology                                     |                                                                     |
| #7              | Small FN | Undisclosed etiology                                     |                                                                     |
| #8              | Small FN | Abnormal metabolic alterations                           | VB6=267 nmol/L                                                      |
| #9              | Small FN | Undisclosed etiology                                     |                                                                     |
| #10             | Small FN | Undisclosed etiology                                     |                                                                     |
| #11             | Small FN | Glucose dysmetabolism                                    | DM                                                                  |
| #12             | Small FN | Glucose dysmetabolism                                    | HbA1c=11.2%                                                         |
| #13             | Small FN | Undisclosed etiology                                     |                                                                     |
| #14             | Small FN | Abnormal metabolic alterations                           | VB12=490 pg/L; Hcy=12.6 umol/L                                      |
| #15             | Small FN | Undisclosed etiology                                     |                                                                     |
| #16             | Small FN | Undisclosed etiology                                     |                                                                     |
| #17             | Small FN | Glucose dysmetabolism                                    | HbA1c=7.5%                                                          |
| #18             | Small FN | Undisclosed etiology                                     |                                                                     |
| #19             | Small FN | Abnormal metabolic alterations                           | VB12=297 pg/L; MMA=468 nmol/L                                       |
| #20             | Small FN | Glucose dysmetabolism and abnormal metabolic alterations | DM; VB12=245 pg/L; Hcy=15.5 umol/L; VB6=160 nmol/L                  |
| #21             | Small FN | Glucose dysmetabolism                                    | DM                                                                  |
| #22             | Small FN | Abnormal metabolic alterations                           | VB6=205 nmol/L                                                      |
| #23             | Small FN | Glucose dysmetabolism and abnormal metabolic alterations | DM; VB12=485 pg/L; Hcy=12.7 umol/L                                  |
| #24             | Small FN | Undisclosed etiology                                     |                                                                     |
| #25             | Small FN | Undisclosed etiology                                     |                                                                     |
| #26             | Small FN | Glucose dysmetabolism and abnormal metabolic alterations | DM; VB12=483 pg/L; MMA=1221 nmol/L; Hcy=12.3 umol/L; VB6=135 nmol/L |
| #27             | Small FN | Abnormal metabolic alterations                           | VB12=329 pg/L; Hcy=15.6 umol/L                                      |
| #28             | Small FN | Undisclosed etiology                                     |                                                                     |
| #29             | Both     | Glucose dysmetabolism                                    | HbA1c=7.4%                                                          |
| #30             | Both     | Undisclosed etiology                                     |                                                                     |
| #31             | Both     | Undisclosed etiology                                     |                                                                     |
| #32             | Both     | Abnormal metabolic alterations                           | VB12=239 pg/L; Hcy=14.7 umol/L; VB6=138 nmol/L                      |
| #33             | Both     | Abnormal metabolic alterations                           | VB12=213 pg/L; MMA=784 nmol/L; Hcy=13.8 umol/L; VB6=396 nmol/L      |
| #34             | Both     | Glucose dysmetabolism                                    | DM                                                                  |
| #35             | Both     | Glucose dysmetabolism and abnormal metabolic alterations | DM; VB12=179 pg/L; MMA=455 nmol/L; Hcy=13.3 umol/L                  |
| #36             | Large FN | Undisclosed etiology                                     |                                                                     |
| #37             | Large FN | Abnormal metabolic alterations                           | VB12=271 pg/L; MMA=801 nmol/L; Hcy=11.3 umol/L                      |
| #38             | Large FN | Undisclosed etiology                                     |                                                                     |
| #39             | Large FN | Undisclosed etiology                                     |                                                                     |
| #40             | Large FN | Undisclosed etiology**                                   |                                                                     |

**DM**= previously diagnosed Diabetes Mellitus; **HbA1c**= Hemoglobin A1c; **Hcy**= Homocysteine; **MMA**= Methylmalonic acid; **VB6**= vitamin B6; **VB12**= vitamin B12; \*\* due to incomplete investigation.

## Supplementary Figure I. Phospho- $\alpha$ -synuclein staining and localization.

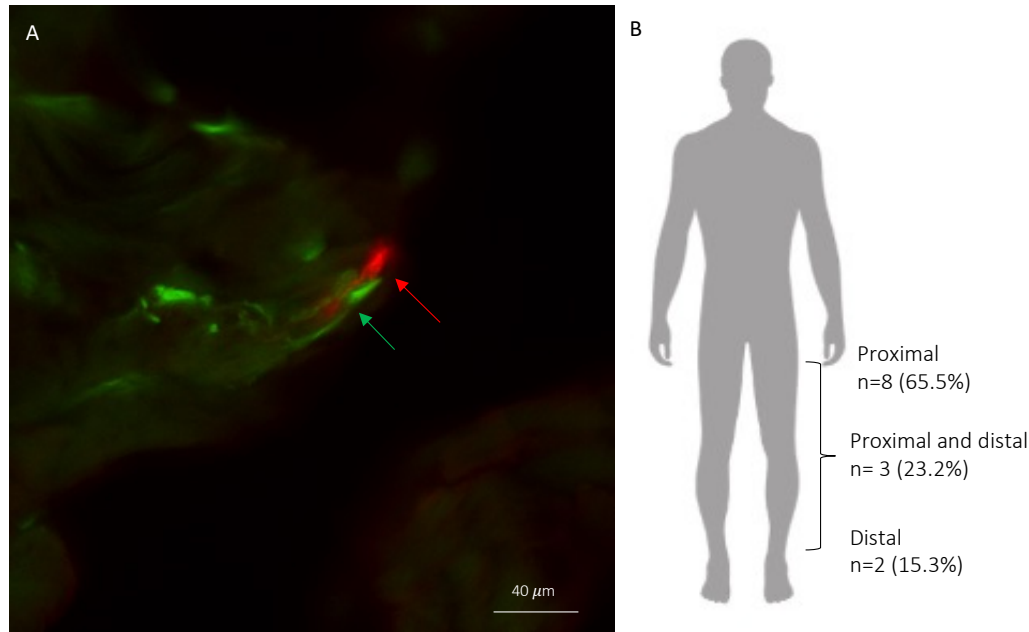

**(A)** Photomicrograph of skin biopsy of one PD participant double stained with anti-PGP9.5 (red) and anti-phospho- $\alpha$ -synuclein (green). Note colocalization phospho- $\alpha$ -synuclein (green arrows) in a nerve fiber (red arrows) of the subepidermal plexus. Images were acquired via motorized widefield fluorescence microscope at 40x/0.60 objective (Leica DMI6000, Leica Microsystems). **(B)** Phospho- $\alpha$ -synuclein localization (n, %).

**Supplementary table 4.** Estimated means and univariate analysis of variances of the main gait parameters during straight walking, circular walking and turns at OFF and ON medication states in Parkinson's disease patients with (PD-PNP) and without (PD-noPNP) peripheral neuropathy.

| Straight walking        |                  |          |         |            |                         |             |                 |
|-------------------------|------------------|----------|---------|------------|-------------------------|-------------|-----------------|
| Gait parameter          | Medication state | PD group | Mean    | Std. Error | 95% Confidence Interval |             | Univariate test |
|                         |                  |          |         |            | Lower                   | Upper Bound |                 |
| Stride length (m)       | OFF              | PD-noPNP | 0.964   | 0.026      | 0.913                   | 1.014       | p=0.029*        |
|                         |                  | PD-PNP   | 0.878   | 0.029      | 0.819                   | 0.936       |                 |
|                         | ON               | PD-noPNP | 1.025   | 0.025      | 0.975                   | 1.075       | p=0.013*        |
|                         |                  | PD-PNP   | 0.929   | 0.028      | 0.873                   | 0.986       |                 |
| Gait speed (m/s)        | OFF              | PD-noPNP | 0.922   | 0.023      | 0.877                   | 0.967       | p=0.005**       |
|                         |                  | PD-PNP   | 0.822   | 0.026      | 0.77                    | 0.874       |                 |
|                         | ON               | PD-noPNP | 0.993   | 0.022      | 0.949                   | 1.037       | p=0.006**       |
|                         |                  | PD-PNP   | 0.900   | 0.025      | 0.85                    | 0.95        |                 |
| Heel strike angle (deg) | OFF              | PD-noPNP | 11.411  | 0.654      | 10.112                  | 12.709      | p=0.826         |
|                         |                  | PD-PNP   | 11.192  | 0.751      | 9.701                   | 12.682      |                 |
|                         | ON               | PD-noPNP | 12.239  | 0.621      | 11.004                  | 13.473      | p=0.936         |
|                         |                  | PD-PNP   | 12.163  | 0.703      | 10.765                  | 13.562      |                 |
| Toe off angle (deg)     | OFF              | PD-noPNP | -54.865 | 1.099      | -57.048                 | -52.683     | p=0.002**       |
|                         |                  | PD-PNP   | -49.633 | 1.261      | -52.139                 | -47.127     |                 |
|                         | ON               | PD-noPNP | -57.932 | 0.997      | -59.914                 | -55.949     | p<0.001***      |
|                         |                  | PD-PNP   | -51.914 | 1.129      | -54.159                 | -49.668     |                 |
| Circular walking        |                  |          |         |            |                         |             |                 |
| Gait parameter          | Medication state | PD group | Mean    | Std. Error | 95% Confidence Interval |             | Univariate test |
|                         |                  |          |         |            | Lower                   | Upper Bound |                 |
| Stride length (m)       | OFF              | PD-noPNP | 0.593   | 0.016      | 0.56                    | 0.626       | p=0.28          |
|                         |                  | PD-PNP   | 0.566   | 0.019      | 0.529                   | 0.603       |                 |
|                         | ON               | PD-noPNP | 0.679   | 0.02       | 0.638                   | 0.719       | p=0.116         |
|                         |                  | PD-PNP   | 0.63    | 0.023      | 0.585                   | 0.676       |                 |
|                         | OFF              | PD-noPNP | 0.561   | 0.02       | 0.521                   | 0.601       | p=0.019*        |

|                                  |     |          |         |       |         |         |           |
|----------------------------------|-----|----------|---------|-------|---------|---------|-----------|
| Gait speed<br>(m/s)              | ON  | PD-PNP   | 0.489   | 0.023 | 0.444   | 0.534   | p=0.057   |
|                                  |     | PD-noPNP | 0.66    | 0.021 | 0.619   | 0.701   |           |
|                                  |     | PD-PNP   | 0.6     | 0.023 | 0.553   | 0.646   |           |
| Heel strike<br>angle (deg)       | OFF | PD-noPNP | 6.198   | 0.528 | 5.15    | 7.246   | p=0.773   |
|                                  |     | PD-PNP   | 5.968   | 0.597 | 4.783   | 7.154   |           |
|                                  | ON  | PD-noPNP | 7.295   | 0.45  | 6.401   | 8.188   | p=0.341   |
| Toe off angle<br>(deg)           | OFF | PD-noPNP | -38.717 | 1.168 | -41.036 | -36.397 | p=0.007** |
|                                  |     | PD-PNP   | -33.852 | 1.321 | -36.476 | -31.229 |           |
|                                  | ON  | PD-noPNP | -43.685 | 1.054 | -45.779 | -41.591 | p=0.001** |
|                                  |     | PD-PNP   | -38.464 | 1.184 | -40.816 | -36.112 |           |
| Peak angular<br>velocity (deg/s) | OFF | PD-noPNP | 58.27   | 1.921 | 54.456  | 62.084  | p=0.002** |
|                                  |     | PD-PNP   | 48.997  | 2.153 | 44.722  | 53.271  |           |
|                                  | ON  | PD-noPNP | 59.85   | 1.726 | 56.42   | 63.279  | p=0.01*   |
|                                  |     | PD-PNP   | 54.397  | 1.922 | 50.579  | 58.215  |           |

#### Turns (TUG assessment)

| Gait<br>parameter                | Medication<br>state | PD group | Mean   | Std. Error | 95% Confidence Interval |             | Univariate<br>test |
|----------------------------------|---------------------|----------|--------|------------|-------------------------|-------------|--------------------|
|                                  |                     |          |        |            | Lower                   | Upper Bound |                    |
| Duration of<br>turns             | OFF                 | PD-noPNP | 3.161  | 0.118      | 2.926                   | 3.396       | p=0.007**          |
|                                  |                     | PD-PNP   | 3.655  | 0.136      | 3.386                   | 3.924       |                    |
|                                  | ON                  | PD-noPNP | 3.049  | 0.098      | 2.854                   | 3.244       | p=0.042*           |
|                                  |                     | PD-PNP   | 3.358  | 0.113      | 3.133                   | 3.583       |                    |
| Peak angular<br>velocity (deg/s) | OFF                 | PD-noPNP | 58.27  | 1.921      | 54.456                  | 62.084      | P=0.002**          |
|                                  |                     | PD-PNP   | 48.997 | 2.153      | 44.722                  | 53.271      |                    |
|                                  | ON                  | PD-noPNP | 59.85  | 1.726      | 56.42                   | 63.279      | P=0.01*            |
|                                  |                     | PD-PNP   | 54.397 | 1.922      | 50.579                  | 58.215      |                    |

PD-PNP: Parkinson's disease patients with peripheral neuropathy; PD-noPNP: Parkinson's disease patients without peripheral neuropathy. Covariates appearing in the model are evaluated at the following values: Age = 67.13. \* p<0.05; \*\*p<0.01; \*\*\*p<0.001.

**Supplementary table 5.** Estimated means and univariate analysis of variances of balance parameters during closed eyes on the foam condition at OFF medication state in Parkinson's disease patients with (PD-PNP) and without (PD-noPNP) peripheral neuropathy.

| Closed eyes static<br>balance OFF            | PD group | Mean   | Std. Error | 95% Confidence Interval |             | Univariate |
|----------------------------------------------|----------|--------|------------|-------------------------|-------------|------------|
|                                              |          |        |            | Lower Bound             | Upper Bound |            |
| Jerk AP (cm/s <sup>3</sup> )                 | PD-noPNP | 0.081  | 0.002      | 0.078                   | 0.084       | p=0.028*   |
|                                              | PD-PNP   | 0.084  | 0.002      | 0.08                    | 0.088       |            |
| Jerk ML (cm/s <sup>3</sup> )                 | PD-noPNP | 1.131  | 0.044      | 1.044                   | 1.219       | p=0.001**  |
|                                              | PD-PNP   | 1.392  | 0.053      | 1.287                   | 1.497       |            |
| Acceleration AP (cm/s <sup>2</sup> )         | PD-noPNP | 3.115  | 0.278      | 2.558                   | 3.672       | p=0.03*    |
|                                              | PD-PNP   | 3.992  | 0.334      | 3.324                   | 4.66        |            |
| Acceleration ML (cm/s <sup>2</sup> )         | PD-noPNP | 0.086  | 0.001      | 0.083                   | 0.088       | p=0.297    |
|                                              | PD-PNP   | 0.088  | 0.002      | 0.084                   | 0.091       |            |
| Velocity AP (cm/s)                           | PD-noPNP | 1.518  | 0.057      | 1.403                   | 1.632       | p=0.034*   |
|                                              | PD-PNP   | 1.715  | 0.069      | 1.577                   | 1.852       |            |
| Velocity ML (cm/s)                           | PD-noPNP | 5.935  | 0.574      | 4.786                   | 7.084       | p=0.578    |
|                                              | PD-PNP   | 4.689  | 0.689      | 3.31                    | 6.069       |            |
| Sway area (cm <sup>2</sup> /s <sup>4</sup> ) | PD-noPNP | 31.121 | 1.895      | 27.328                  | 34.914      | p<0.001*** |
|                                              | PD-PNP   | 43.69  | 2.274      | 39.138                  | 48.242      |            |

PD-PNP: Parkinson's disease patients with peripheral neuropathy; PD-noPNP: Parkinson's disease patients without peripheral neuropathy. Covariates appearing in the model are evaluated at the following values: Age = 67.13. \* p<0.05; \*\*p<0.01; \*\*\*p<0.001.

**Supplementary table 6.** Comparison of gait and balance parameters between Parkinson's disease patients with large and small fiber neuropathy (FN) groups and without peripheral neuropathy (PD-noPNP).

| Straight walking                          |                  |           |          |                 |            |           |                |        |
|-------------------------------------------|------------------|-----------|----------|-----------------|------------|-----------|----------------|--------|
| Gait parameter                            | Medication state | PNP types |          | Mean Difference | Std. Error | Sig.      | 95% Confidence |        |
|                                           |                  |           |          |                 |            |           | Lower          | Upper  |
| Stride length (m)                         | OFF              | PD-noPNP  | Large FN | 0.112           | 0.062      | 0.074     | -0.011         | 0.235  |
|                                           |                  | PD-noPNP  | Small FN | 0.067           | 0.046      | 0.148     | -0.024         | 0.159  |
|                                           |                  | Large FN  | Small FN | -0.044          | 0.067      | 0.513     | -0.178         | 0.09   |
| Stride length (m)                         | ON               | PD-noPNP  | Large FN | 0.117           | 0.055      | 0.037*    | 0.007          | 0.226  |
|                                           |                  | PD-noPNP  | Small FN | 0.079           | 0.04       | 0.052     | -0.001         | 0.16   |
|                                           |                  | Large FN  | Small FN | -0.037          | 0.06       | 0.535     | -0.156         | 0.081  |
| Gait speed (m/s)                          | OFF              | PD-noPNP  | Large FN | 0.123           | 0.057      | 0.032*    | 0.011          | 0.236  |
|                                           |                  | PD-noPNP  | Small FN | 0.086           | 0.042      | 0.046*    | 0.002          | 0.17   |
|                                           |                  | Large FN  | Small FN | -0.037          | 0.062      | 0.546     | -0.16          | 0.085  |
| Gait speed (m/s)                          | ON               | PD-noPNP  | Large FN | 0.1             | 0.048      | 0.041*    | 0.004          | 0.196  |
|                                           |                  | PD-noPNP  | Small FN | 0.092           | 0.035      | 0.011*    | 0.021          | 0.162  |
|                                           |                  | Large FN  | Small FN | -0.008          | 0.052      | 0.877     | -0.112         | 0.096  |
| Toe-off angle (deg)                       | OFF              | PD-noPNP  | Large FN | -8.686          | 2.438      | 0.001**   | -13.53         | -3.843 |
|                                           |                  | PD-noPNP  | Small FN | -3.596          | 1.851      | 0.055     | -7.274         | 0.081  |
|                                           |                  | Large FN  | Small FN | 5.09            | 2.659      | 0.059     | -0.193         | 10.373 |
| Toe-off angle (deg)                       | ON               | PD-noPNP  | Large FN | -9.383          | 2.311      | <0.001*** | -13.978        | -4.788 |
|                                           |                  | PD-noPNP  | Small FN | -4.657          | 1.652      | 0.006**   | -7.941         | -1.373 |
|                                           |                  | Large FN  | Small FN | 4.725           | 2.475      | 0.06      | -0.196         | 9.647  |
| Circular walking                          |                  |           |          |                 |            |           |                |        |
| Stride length (m)                         | OFF              | PD-noPNP  | Large FN | 0.015           | 0.036      | 0.682     | -0.057         | 0.086  |
|                                           |                  | PD-noPNP  | Small FN | 0.036           | 0.028      | 0.193     | -0.019         | 0.091  |
|                                           |                  | Large FN  | Small FN | 0.021           | 0.04       | 0.59      | -0.057         | 0.1    |
| Stride length (m)                         | ON               | PD-noPNP  | Large FN | 0.037           | 0.046      | 0.416     | -0.054         | 0.129  |
|                                           |                  | PD-noPNP  | Small FN | 0.059           | 0.034      | 0.089     | -0.009         | 0.127  |
|                                           |                  | Large FN  | Small FN | 0.022           | 0.05       | 0.664     | -0.077         | 0.12   |
| Gait speed (m/s)                          | OFF              | PD-noPNP  | Large FN | 0.062           | 0.044      | 0.167     | -0.026         | 0.149  |
|                                           |                  | PD-noPNP  | Small FN | 0.082           | 0.034      | 0.019*    | 0.014          | 0.149  |
|                                           |                  | Large FN  | Small FN | 0.02            | 0.048      | 0.682     | -0.076         | 0.116  |
| Gait speed (m/s)                          | ON               | PD-noPNP  | Large FN | 0.009           | 0.046      | 0.85      | -0.083         | 0.1    |
|                                           |                  | PD-noPNP  | Small FN | 0.084           | 0.035      | 0.017*    | 0.015          | 0.152  |
|                                           |                  | Large FN  | Small FN | 0.075           | 0.05       | 0.135     | -0.024         | 0.174  |
| Toe-off angle (deg)                       | OFF              | PD-noPNP  | Large FN | -6.731          | 2.577      | 0.01*     | -11.847        | -1.615 |
|                                           |                  | PD-noPNP  | Small FN | -3.949          | 1.983      | 0.049*    | -7.887         | -0.011 |
|                                           |                  | Large FN  | Small FN | 2.782           | 2.811      | 0.325     | -2.8           | 8.364  |
| Toe-off angle (deg)                       | ON               | PD-noPNP  | Large FN | -5.712          | 2.324      | 0.016*    | -10.326        | -1.099 |
|                                           |                  | PD-noPNP  | Small FN | -5.371          | 1.735      | 0.003**   | -8.815         | -1.927 |
|                                           |                  | Large FN  | Small FN | 0.342           | 2.531      | 0.893     | -4.683         | 5.366  |
| Peak ang vel (deg/s)                      | OFF              | PD-noPNP  | Large FN | 13.489          | 8.699      | 0.124     | -3.783         | 30.761 |
|                                           |                  | PD-noPNP  | Small FN | 14.545          | 6.688      | 0.032*    | 12.65          | 27.824 |
|                                           |                  | Large FN  | Small FN | 1.056           | 9.489      | 0.912     | -17.785        | 19.897 |
| Peak ang vel (deg/s)                      | ON               | PD-noPNP  | Large FN | 16.806          | 9.331      | 0.075     | -1.722         | 35.334 |
|                                           |                  | PD-noPNP  | Small FN | 16.121          | 6.973      | 0.023*    | 2.276          | 29.965 |
|                                           |                  | Large FN  | Small FN | -0.685          | 10.145     | 0.946     | -20.829        | 19.458 |
| Static balance with closed eyes on a foam |                  |           |          |                 |            |           |                |        |
| Balance parameter                         | Medication state | PNP types |          | Mean Difference | Std. Error | Sig.      | 95% Confidence |        |
|                                           |                  |           |          |                 |            |           | Lower          | Upper  |
| Jerk AP (cm/s <sup>3</sup> )              | OFF              | PD-noPNP  | Large FN | -0.005          | 0.004      | 0.206     | -0.013         | 0.003  |
|                                           |                  | PD-noPNP  | Small FN | -0.003          | 0.003      | 0.261     | -0.008         | 0.002  |
|                                           |                  | Large FN  | Small FN | 0.002           | 0.004      | 0.649     | -0.006         | 0.01   |
| Jerk ML (cm/s <sup>3</sup> )              | OFF              | PD-noPNP  | Large FN | -0.331          | 0.112      | 0.004**   | -0.554         | -0.107 |
|                                           |                  | PD-noPNP  | Small FN | -0.125          | 0.088      | 0.16      | -0.299         | 0.05   |

|                                                 |     |          |          |         |       |           |         |        |
|-------------------------------------------------|-----|----------|----------|---------|-------|-----------|---------|--------|
|                                                 |     | Large FN | Small FN | 0.206   | 0.126 | 0.106     | -0.045  | 0.458  |
| Acc AP (cm/s <sup>2</sup> )                     | OFF | PD-noPNP | Large FN | -0.398  | 0.617 | 0.521     | -1.628  | 0.832  |
|                                                 |     | PD-noPNP | Small FN | -0.959  | 0.492 | 0.055     | -1.939  | 0.022  |
|                                                 |     | Large FN | Small FN | -0.561  | 0.696 | 0.423     | -1.948  | 0.827  |
| Acc ML (cm/s <sup>2</sup> )                     | OFF | PD-noPNP | Large FN | -0.008  | 0.003 | 0.005**   | -0.013  | -0.002 |
|                                                 |     | PD-noPNP | Small FN | 0       | 0.002 | 0.885     | -0.004  | 0.004  |
|                                                 |     | Large FN | Small FN | 0.007   | 0.003 | 0.013*    | 0.002   | 0.013  |
| Vel AP (cm/s)                                   | OFF | PD-noPNP | Large FN | -0.285  | 0.15  | 0.062     | -0.585  | 0.014  |
|                                                 |     | PD-noPNP | Small FN | -0.094  | 0.109 | 0.387     | -0.311  | 0.122  |
|                                                 |     | Large FN | Small FN | 0.191   | 0.165 | 0.25      | -0.137  | 0.519  |
| Vel ML (cm/s)                                   | OFF | PD-noPNP | Large FN | 0.093   | 1.217 | 0.94      | -2.333  | 2.518  |
|                                                 |     | PD-noPNP | Small FN | 1.21    | 0.906 | 0.185     | -0.594  | 3.015  |
|                                                 |     | Large FN | Small FN | 1.118   | 1.334 | 0.405     | -1.541  | 3.777  |
| Sway area<br>(cm <sup>2</sup> /s <sup>4</sup> ) | OFF | PD-noPNP | Large FN | -17.145 | 4.563 | <0.001*** | -26.258 | -8.033 |
|                                                 |     | PD-noPNP | Small FN | -8.854  | 3.281 | 0.009**   | -15.407 | -2.302 |
|                                                 |     | Large FN | Small FN | 8.291   | 5.003 | 0.102     | -1.7    | 18.282 |

PD-PNP: Parkinson's disease patients with peripheral neuropathy; PD-noPNP: Parkinson's disease patients without peripheral neuropathy. \* p<0.05; \*\*p<0.01; \*\*\*p<0.001.
